# Supplementary material for: Characteristics of Land-Use Carbon Emissions and Carbon Balance Zoning in the Economic Belt on the Northern Slope of Tianshan
Source: MDPI journal article supplement (doi:10.3390/su151511778), 2023-07-31
Supplement: s1 [file s1]

## Supplementary Materials

**Table S1.** Total energy consumptions of 12 selected regions in northern slope of Tianshan mountain (Total consumptions /  $10^4$  t)

|                                      | 1990    | 2000     | 2010      | 2020     |
|--------------------------------------|---------|----------|-----------|----------|
| Coal/ $10^4$ t                       | 1839.12 | 555.6851 | 1420.4646 | 2252.36  |
| Cleaned coal/ $10^4$ t               | 58.90   | 58.0819  | 261.8878  | 296.73   |
| Coke                                 | 3.11    | 57.3109  | 327.4116  | 251.67   |
| Gasoline/ $10^4$ t                   | 4.62    | 0.1978   | 0.0113    | 642.84   |
| Kerosene/ $10^4$ t                   | 73.07   | 1.7864   | 1.3002    | 12468.18 |
| Diesel oil/ $10^4$ t                 | 88.35   | 2.7535   | 4.3648    | 28265.62 |
| Fuel oil/ $10^4$ t                   | 2.47    | 36.9521  | 24.6571   | 497.18   |
| Liquefied<br>petroleum gas/ $10^4$ t | 5.35    | 38.713   | 0.0505    | 183.61   |
| Natural gas/ $10^4$ m <sup>3</sup>   | 49.452  | 46.283   | 83.114    | 216.472  |

**Table S2.** Per capita Gross Domestic Product value of 12 selected regions in northern slope of Tianshan mountain in 1990, 2000, 2010 and 2020 (10<sup>3</sup> CNY)

|          | 1990     | 2000     | 2010     | 2020     |
|----------|----------|----------|----------|----------|
| Urumqi   | 4538.403 | 13533.28 | 53680.26 | 82321.81 |
| Karamay  | 9978.482 | 51402.61 | 251984.8 | 179903.9 |
| Dushanzi | 11554.46 | 8624.931 | 10423.04 | 11680.9  |
| Manas    | 3419.719 | 15682.76 | 57891.43 | 82827.77 |
| Hutubi   | 1614.645 | 7356.46  | 36631.5  | 88293.95 |
| Usu      | 3024.022 | 12303.53 | 42238.38 | 89212.23 |
| Kuitun   | 1470.992 | 3909.138 | 23537.04 | 67403.81 |
| Miquan   | 1747.175 | 7855.383 | 2269.949 | 13345.74 |
| Shihezi  | 1178.465 | 4297.262 | 21620.68 | 52543.74 |
| Fukang   | 2641.627 | 10247.27 | 48163.78 | 124787.8 |
| Changji  | 2185.815 | 7297.131 | 49182.3  | 101492   |
| Shawan   | 3922.436 | 17193.04 | 50240.77 | 6490.407 |

**Table S3.** Population density of 12 selected regions in northern slope of Tianshan mountain in 1990, 2000, 2010 and 2020 (10<sup>4</sup> person/km<sup>2</sup>)

|          | 1990        | 2000        | 2010        | 2020        |
|----------|-------------|-------------|-------------|-------------|
| Urumqi   | 0.008827293 | 0.013861638 | 0.016762462 | 0.027252865 |
| Karamay  | 0.002365507 | 0.00311545  | 0.003262075 | 0.005696788 |
| Dushanzi | 0.007483316 | 0.013381868 | 0.018200522 | 0.021581656 |
| Manas    | 0.001509263 | 0.001777443 | 0.001834897 | 0.002491333 |
| Hutubi   | 0.00180476  | 0.002238237 | 0.002315033 | 0.00194777  |
| Usu      | 0.001156263 | 0.001331111 | 0.001592323 | 0.001618198 |
| Kuitun   | 0.000203008 | 0.000257104 | 0.000277054 | 0.000198668 |
| Miquan   | 0.004386222 | 0.005311585 | 0.004930417 | 0.00029348  |
| Shihezi  | 0.115701396 | 0.128300648 | 0.135756838 | 0.147367048 |
| Fukang   | 0.001453233 | 0.001792543 | 0.001963686 | 0.001982432 |
| Changji  | 0.003470244 | 0.005160717 | 0.004839363 | 0.005039562 |
| Shawan   | 0.001304753 | 0.001488674 | 0.001704718 | 0.001743372 |
